# Supplementary material for: The duration of travel impacts the spatial dynamics of infectious diseases
Source: PubMed Central journal article supplement — Proc Natl Acad Sci U S A. 2020 Aug 24;117(36):22572–9. doi: 10.1073/pnas.1922663117 (PMC7486699; doi:10.1073/pnas.1922663117), 2020-08-24
Supplement: pnas.1922663117.sapp.pdf [file pnas.1922663117.sapp.pdf]

1

## 2 **Supplementary Information for**

### 3 **The duration of travel impacts the spatial dynamics of infectious diseases**

4 **John R. Giles, Elizabeth zu Erbach-Schoenberg, Andrew J. Tatem, Lauren Gardner, Ottar N. Bjørnstad, C. Jessica E. Metcalf**  
5 **and Amy Wesolowski**

6 **John R. Giles.**  
7 **E-mail: [giles@jhu.edu](mailto:giles@jhu.edu)**

#### 8 **This PDF file includes:**

- 9     Supplementary text
- 10    Figs. S1 to S17
- 11    Tables S1 to S3
- 12    References for SI reference citations

**John R. Giles, Elizabeth zu Erbach-Schoenberg, Andrew J. Tatem, Lauren Gardner, Ottar N. Bjørnstad, C. Jessica E. Metcalf**  
**and Amy Wesolowski**

## 13 Supporting Information Text

### 14 Hierarchical Bayesian model to estimate trip duration decay

15 To model the variation in duration of stay for commuter trips across different routes of travel, we estimated  $N_{\text{decay}}(y_{ij})$ , which  
16 is the expected number of commuters making a trip of duration  $y$  when travelling from origin district  $i$  to destination district  $j$ .  
17 The model uses an exponential decay function based upon the time spent  $y$  in district  $j$  that is linked to observations of call  
18 data records through a Normal error distribution that has inverse variance. The inverse variance is scaled by parameter  $\nu_{ij}$ ,  
19 which varies across all  $i \rightarrow j$  routes.

$$\begin{aligned} N_{\text{decay}}(y_{ij}) &\sim \text{Norm}(\eta_{ij}, \varepsilon_{ij}) \\ \eta_{ij} &= N_{0_{ij}} e^{-\lambda_{ij} y_{ij}} \\ \varepsilon_{ij} &= (1/y_{ij})^{\nu_{ij}} \end{aligned} \quad [1]$$

21 The intercept term ( $N_{0_{ij}}$ ) is the observed number of trips at  $y = 0$  for each  $i \rightarrow j$  route. We estimated decay rate parameters  
22 ( $\lambda$ ) in the model hierarchically at both the population- and route-level to facilitate comparison of decay rates across different  
23 route types and compensate for routes that have lower sample sizes. Where,  $\lambda_{ij}$  in Equation 1 is the decay rate at the  
24 route-level, which is estimated by small modifications ( $\Delta$ ) to the population-level hyperparameter  $\lambda'$  such that  $\lambda_{ij} = \lambda' \cdot \Delta_{ij}^{\lambda'}$ .  
25 The population-level hyperparameter  $\lambda'$  was given the uninformative prior of  $\text{Unif}(0, 25)$  and  $\Delta_{ij}^{\lambda'}$  is a scaling factor with the  
26 prior  $\text{Gamma}(2, 1)$ . Figure S2 shows the hierarchical model graph.

27 The decay model likelihood uses a Normal link function with inverse variance. Based on preliminary analyses, we found that  
28 high rates of decay along with a long tailed distribution of observed trip duration required a higher weight to be placed on lower  
29  $y$ -values. Therefore, we defined the variance of the model likelihood as  $(1/y_{ij})^{\nu_{ij}}$ , which takes the inverse of each  $y_{ij}$  value  
30 scaled by the route-level parameter  $\nu_{ij}$ . The  $\nu_{ij}$  parameter is estimated with the uninformative prior  $\text{Gamma}(1, 1)$  such that  
31  $\nu_{ij}$  is expected to be near 0 (all inverse weights  $\sim 1$ ) and can be increased by the MCMC algorithm as needed for improved fit.

32 **Gravity model incorporating both trip counts and trip duration.** Initial data exploration suggested that the distribution of trip  
33 distances may be dependent upon trip duration. We developed a formulation of the gravity model that accounts for this  
34 interdependence between trip quantity and trip duration by incorporating the trip duration decay parameter  $\lambda_{ij}$  into the  
35 dispersal kernel so that the probability of movement to destination  $j$  also depends on the duration of stay at destination  $j$ .  
36 Note that subscripts  $ij$  represent movement from origin  $i$  to destination  $j$  ( $i \rightarrow j$ ).

$$\begin{aligned} m_{ij} &\sim \text{Pois}(\pi_{ij} N_i) \\ \pi_{ij} &= c_{ij} / \sum_{\forall j} c_{ij} \\ c_{ij} &= \theta \left( \frac{N_i^{\omega_1} N_j^{\omega_2}}{f(d_{ij} | \lambda_{ij})} \right) \end{aligned} \quad [2]$$

38 Gravity model parameters are fit through normalized connectivity values ( $\pi_{ij}$ ) that ensure integer values in the Poisson  
39 likelihood function are scaled proportional to observed trip counts ( $m_{ij}$ ). The exponential parameters  $\omega_1$  and  $\omega_2$  are weights  
40 that scale the contribution of origin and destination population sizes to the numerator, and  $\theta$  is a proportionality constant.  
41 The denominator of the gravity model,  $f(d_{ij} | \lambda_{ij})$ , is comprised of a dispersal kernel function conditioned on trip duration.  
42 We derived the conditional dispersal kernel function using Bayes theorem:

$$f(d_{ij} | \lambda_{ij}) = \frac{f(\lambda_{ij} | d_{ij}) f(d_{ij})}{f(\lambda_{ij})} \propto f(\lambda_{ij} | d_{ij}) f(d_{ij}). \quad [3]$$

44 Where,  $f(\lambda_{ij} | d_{ij})$  is the expected rate of decay in trip duration given the distance between districts  $i$  and  $j$ , and  $f(d_{ij})$  is a  
45 typical distance-based spatial dispersal kernel. This formulation of the conditional dispersal kernel  $f(d_{ij} | \lambda_{ij})$  acts as a penalty  
46 on connectivity values that is proportional to the probability of a trip of distance  $d_{ij}$  that emanates from origin  $i$  given the  
47 decay rate parameter  $\lambda_{ij}$ . Values of the decay rate parameter were supplied by the mean of the posterior distribution of  $\lambda_{ij}$   
48 estimated by the trip duration decay model.

49 To estimate the conditional dispersal kernel terms derived in Equation 3, we modeled  $f(d_{ij})$  using the typical exponentiated  
50 term  $d_{ij}^{\gamma}$ , and  $f(\lambda_{ij} | d_{ij})$  as the complement of the Empirical Cumulative Distribution Function (ECDF) of  $\lambda_{ij}$  with  
51 origin-specific model fitting parameters  $\alpha_i$ :

$$f(d_{ij} | \lambda_{ij}) = d_{ij}^{\gamma} (1 - \text{ECDF}(\lambda_{ij})^{\alpha_i}). \quad [4]$$

### 53 Simulating disease dynamics

54 Disease dynamics were simulated using a stochastic Time series Susceptible-Infected-Recovered (TSIR) model (1–5). We apply  
55 the TSIR framework to a meta-population structure that allows us to include connectivity due to seasonal commuting and trip  
56 duration, which were estimated in the previous sections. We begin by defining local epidemic intensity as the expected number

57 of new infections  $\mathbb{E}[I_{j,t+1}]$  at location  $j$  and time step  $t + 1$  by building upon the previous definition of spatial force of infection  
58 in (6).

$$59 \quad \mathbb{E}[I_{j,t+1}] = \frac{\beta S_{jt}(I_{jt} + \nu_{jt} + \kappa_{jt})^\alpha}{N_{jt}} \quad [5]$$

60 The epidemic process in Equation 5 relies on the movement of infected individuals to track spatial diffusion of the pathogen,  
61 and assumes frequency dependent transmission with an absence of demographic stochasticity. The exponent  $\alpha$  (typically  $< 1$ )  
62 is included to allow for nonlinearities in transmission and the stability of endemic equilibrium (3, 7). It can also be interpreted  
63 as the extent of population substructure that limits homogeneous mixing within that location (5). Since we model spatial  
64 dynamics with the mobility of infectious individuals, the susceptible population can be straightforwardly defined as:

$$65 \quad S_{j,t+1} = S_{jt} - I_{j,t+1}. \quad [6]$$

66 The  $\nu_{jt}$  term is a Poisson random variable with a mean equal to  $m_{jt}$ , which we define as the number infected individuals  
67 migrating to destination  $j$  from all other locations at time step  $t$ . The  $\nu_{jt}$  term is typically used to model the effect of transient  
68 infections that arrive in location  $j$  at time step  $t$ , and remain for one full epidemic generation. However, data on the duration of  
69 trips made along each  $ij$  route allows us to adjust the temporal contribution of Infected individuals from other districts to each  
70 time step of the simulation. This is accomplished by defining  $m_{jt}$  as the sum of the number of infectious individuals at each  
71 origin  $i$  at time step  $t$  scaled by three terms; the probability that an individual leaves district  $i$  ( $\hat{\tau}_i$ ), the estimated probability  
72 of travel from  $i$  to  $j$  ( $\hat{\pi}_{ij}$ ), and the probability that an individual remains in destination  $j$  for a full epidemic generation when  
73 travelling from  $i$  to  $j$  ( $\hat{\rho}_{ij}$ ). Therefore, the contribution to local dynamics from Infected individuals in all other districts is  
74 shown in Equation 7.

$$65 \quad \nu_{jt} = \text{Poisson}(m_{jt})$$

$$75 \quad m_{jt} = \sum_{\forall i \neq j} \left( \hat{\rho}_{ij} \hat{\pi}_{ij} \hat{\tau}_i I_{it} \right) \quad [7]$$

76 In addition to the infectious individuals that visit district  $j$  in time  $t$  ( $\nu_{jt}$ ), there are also infectious individuals that remain  
77 in district  $j$  from previous time steps, which we include as  $\kappa_{jt}$  in Equation 5. The  $\kappa_{jt}$  term is calculated as the number  
78 of infectious individuals that have migrated to district  $j$  in a previous time step  $\nu_{j,t-\delta}$ , multiplied by the mean estimated  
79 decay rate in trip duration  $e^{-\delta\bar{\lambda}_j}$  for destination  $j$ , and the mean probability of remaining in destination  $j$  for a full epidemic  
80 generation after  $\delta$  generations have passed  $\bar{\rho}_j$ . The summation over all previous time steps gives the estimated mean number of  
81 remnant infectious individuals  $r_{jt}$  shown in Equation 8.

$$82 \quad \kappa_{jt} = \text{Poisson}(r_{jt})$$

$$r_{jt} = \bar{\rho}_j \sum_{\delta=1}^t \left( \nu_{j,t-\delta} e^{-\delta\bar{\lambda}_j} \right) \quad [8]$$

83 Both  $\nu_{jt}$  and  $\kappa_{jt}$  terms are discrete random variables with Poisson error, which makes the force of infection of the local disease  
84 dynamics doubly stochastic and dependent on observed patterns in the human mobility data through both the immediate  
85 immigration of infectious individuals and the amount of infectious individuals remaining from previous immigration events.

86 **Probability of leaving origin.** We modeled the probability of an individual leaving district  $i$  ( $\hat{\tau}_i$ ) as a continuous random variable  
87 with Beta distributed error (see Equation 9). We parameterized the Beta distribution with shape parameters  $a_i$  and  $b_i$ , which  
88 we derived from the mean  $\mu_i$  and variance  $\sigma_i^2$  of the observed proportion of individuals that left the origin district  $i$  at time  $t$   
89 ( $x_{it}$ ). Where the index  $t$  represents each unique day in the trip duration data. The  $x_{it}$  term was calculated by dividing the  
90 total number of individuals leaving origin  $i$  at time  $t$  ( $N_{it}^{\text{leave}}$ ) by the total number of observed trips emanating from origin  $i$  at  
91 time  $t$  ( $N_{it}^{\text{leave}} + N_{it}^{\text{stay}}$ ).

$$\hat{\tau}_i \sim \text{Beta}(a_i, b_i)$$

$$92 \quad a_i = \mu_i^2 \left( \frac{1 - \mu_i}{\sigma_i^2} - \frac{1}{\mu_i} \right) \quad \text{and} \quad b_i = a_i \left( \frac{1}{\mu_i} - 1 \right) \quad [9a]$$

$$93 \quad \mathbb{E}[x_i] = \mu_i = \frac{1}{T} \sum_{t=1}^T x_{it} \quad [9b]$$

95

96

$$\mathbb{E}\left[(x_i - \mu_i)^2\right] = \sigma_i^2 = \frac{1}{T} \sum_{t=1}^T (x_{it} - \mu_i)^2 \quad [9c]$$

97

98

$$x_{it} = \frac{N_{it}^{\text{leave}}}{N_{it}^{\text{leave}} + N_{it}^{\text{stay}}} \quad [9d]$$

**Probability of remaining for full epidemic generation.** We incorporated residence time into the spatial force of infection  $\phi_{j,t+1}$  by adjusting the number of infectious individuals that contribute to a time step by the expected probability that visitors will remain at destination  $j$  for the full epidemic generation when travelling along route  $ij$ , which we denote as  $\rho_{ij}$ .

$$\rho_{ij} = \Pr(\text{remaining full generation in destination } j \mid \text{generation time } g)$$

The  $\hat{\rho}_{ij}$  and  $\bar{\rho}_j$  terms in Equations 7 and 8 are random variables drawn from a Beta distribution that is parameterized by the observed proportion of individuals  $p_{ij}$  that remain at destination  $j$  for the full epidemic generation when travelling along route  $ij$ .

$$\hat{\rho}_{ij} \sim \text{Beta}(a_{ij}, b_{ij})$$

99

100

101

102

103

104

105

Since the probability  $\hat{\rho}_{ij}$  depends on the length of the infecting pathogen's generation time, we define it in terms of the generation time  $g$ , where the notation  $g(n)$  indicates the length of time in days of  $n$  epidemic generations. Therefore, the shape parameters  $a_{ij}$  and  $b_{ij}$  are parameterized according to the observed mean  $\mu_{ij}$  and variance  $\sigma_{ij}^2$  of  $p_{ij,g(n)}$ , which is defined as the empirical proportion of individuals that remained in destination  $j$  for the full epidemic generation after  $n$  generation intervals in the trip duration data. Based on preliminary data analysis, we found that the majority of the variation in  $p_{ij,g(n)}$  occurs among spatial locations (districts), therefore we reduced  $p_{ij,g(n)}$  into its route-level mean  $\mu_{ij}$  and variance  $\sigma_{ij}^2$  (see Equation 10).

106

107

$$a_{ij} = \mu_{ij}^2 \left( \frac{1 - \mu_{ij}}{\sigma_{ij}^2} - \frac{1}{\mu_{ij}} \right) \quad \text{and} \quad b_{ij} = a_{ij} \left( \frac{1}{\mu_{ij}} - 1 \right) \quad [10a]$$

108

$$\mathbb{E}[p_{ij}] = \mu_{ij} = \frac{1}{N_g} \sum_{n=1}^{N_g} p_{ij,g(n)} \quad [10b]$$

109

110

$$\mathbb{E}\left[(p_{ij} - \mu_{ij})^2\right] = \sigma_{ij}^2 = \frac{1}{N_g} \sum_{n=1}^{N_g} (p_{ij,g(n)} - \mu_{ij})^2 \quad [10c]$$

The value of  $p_{ij,g(n)}$  is calculated as:

112

$$p_{ij,g(n)} = \frac{\left[ \mathbf{x} \cdot \left( \frac{\mathbf{g} - (g(n-1)-1)}{g(n) - (g(n-1)-1)} \right) \right]}{\sum \mathbf{x}}, \quad [11]$$

113

114

115

116

where the vector  $\mathbf{g} = \{g(n-1), \dots, g(n)\}$  contains all of the time steps (days) that fall within the  $n^{\text{th}}$  epidemic generation observed in the data and  $\mathbf{x} = \{x_{ij,g(n-1)}, \dots, x_{ij,g(n)}\}$  contains the counts of trips made for the corresponding generation. Therefore, Equation 11 provides the empirical proportion of individuals that have travelled from origin  $i$  to destination  $j$  that remain in destination  $j$  for all of the  $n^{\text{th}}$  epidemic generation.

117

118

**Spatial infection hazard.** Following (4), we calculated the time varying spatial hazard based on connectivity of each destination  $j$  at time  $t$  as

119

$$h(j, t) = \frac{\beta S_{jt} (1 - \exp(-x_{jt} \sum_{i \neq j} \hat{\rho}_{ij} \hat{\tau}_i \hat{\tau}_i y_{it}))}{1 / (1 + \beta S_{jt})}. \quad [12]$$

120

121

122

The term  $x_{jt}$  gives the proportion susceptible in destination  $j$  at time step  $t$  ( $S_{jt}/N_{jt}$ ), and  $y_{it}$  gives the proportion of infectious individuals in each origin  $i$  at time step  $t$  ( $I_{it}/N_{it}$ ). We then calculated the probability density function (PDF) for the waiting time of each district over all time steps with

$$w(j, t) = h(j, T) \prod_{t=1}^{T-1} 1 - h(j, t).$$

123

124

125

To calculate the probability of importation  $p(j, t)$ , we used a simple linear combination of all  $N_{\text{sim}}$  simulated realizations of  $w(j, t)$  and then integrated the aggregate PDF by normalizing over all  $T$  time steps (8). We then calculated the peak of the aggregate PDF along with its 50% and 95% highest posterior density (HPD) intervals.

$$p(j, t) = \frac{\sum_{n=1}^{N_{\text{sim}}} w_n(j, t)}{\sum_{n=1}^{N_{\text{sim}}} \sum_{t=1}^T w_n(j, t)}$$

126 **Gravity model without trip duration.** To assess the influence of incorporating trip duration into the gravity model and spatial  
 127 hazard (Equations 2 and 12), we compared our new formulations to those with all terms related to trip duration removed.  
 128 First, we reduced the gravity model to a more basic form by replacing the conditional spatial dispersal kernel  $f(d_{ij} | \lambda_{ij})$  with  
 129 the distance-based dispersal kernel  $f(d_{ij}) = d_{ij}^\gamma$  in Equation 2.

$$\begin{aligned} \pi_{ij}^* &= c_{ij} / \sum_{\forall j} c_{ij} \\ c_{ij} &= \theta \left( \frac{N_i^{\omega_1} N_j^{\omega_2}}{d_{ij}^\gamma} \right) \end{aligned} \quad [13]$$

131 In this formulation,  $\pi_{ij}^*$  indicates the probability of travel from district  $i$  to  $j$  under the basic gravity model. Note that Equation  
 132 13 was not refitted to the call data records, rather it was simulated using the estimated parameters from the full model with  
 133 trip duration included ( $\theta$ ,  $\omega_1$ ,  $\omega_2$ , and  $\gamma$ ). Second, we removed all terms in the TSIR model that depend on the trip duration  
 134 decay rate  $\hat{\lambda}_{ij}$  or the probability of remaining for a full epidemic generation  $\hat{\rho}_{ij}$ , which results in the following TSIR model:

$$\mathbb{E}[I_{j,t+1}] = \phi_{j,t+1} = \frac{\beta S_{jt} (I_{jt} + \iota_{jt})^\alpha}{N_{jt}}. \quad [14]$$

136 Where,

$$\begin{aligned} \iota_{jt} &= \text{Pois}(m_{jt}) \\ m_{jt} &= \sum_{\forall i \neq j} \left( \pi_{ij}^* I_{it} \right) \end{aligned} \quad [15]$$

138 and the time varying spatial hazard based on connectivity of each destination  $j$  at time  $t$  is:

$$h^*(j, t) = \frac{\beta S_{jt} \left( 1 - \exp(-x_{jt} \sum_{\forall i \neq j} \pi_{ij}^* y_{it}) \right)}{1 / (1 + \beta S_{jt})}. \quad [16]$$

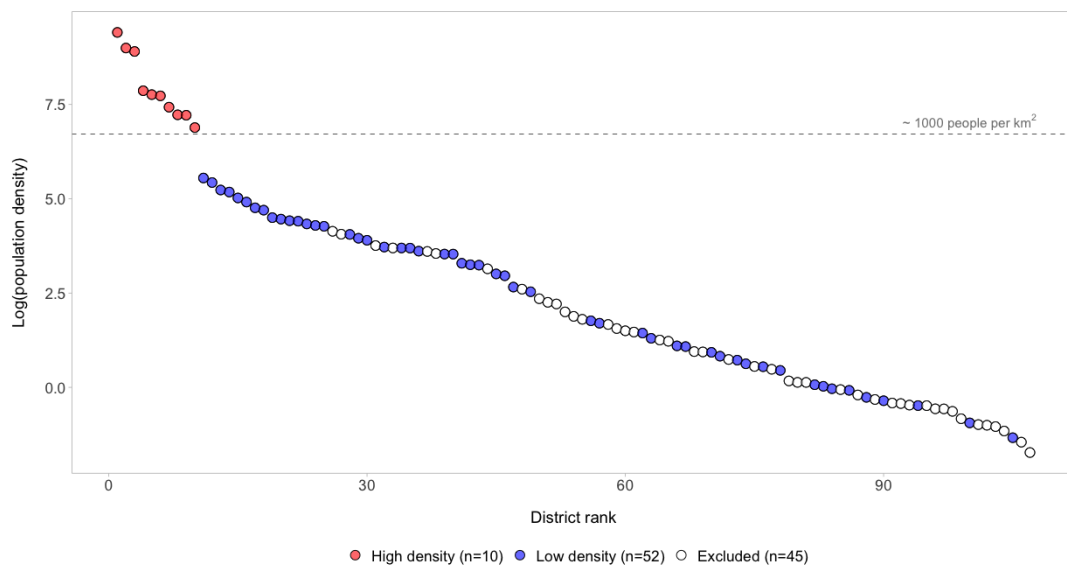

**Fig. S1.** The distribution of population density for districts included in analyses. Districts are ranked in order of district population density on the x-axis with log-transformed population density values on the y-axis. Districts with 'high' relative population density ( $n = 10$ ) are shown in red, districts with 'low' relative population density ( $n = 52$ ) in blue, and districts excluded due to low sample sizes ( $n = 45$ ) are uncolored. The 'high' and 'low' density groups are defined using an arbitrary threshold of 980 people per  $\text{km}^2$  that naturally delineates the 10 districts with noticeably higher population density than all other districts in Namibia (dashed line).

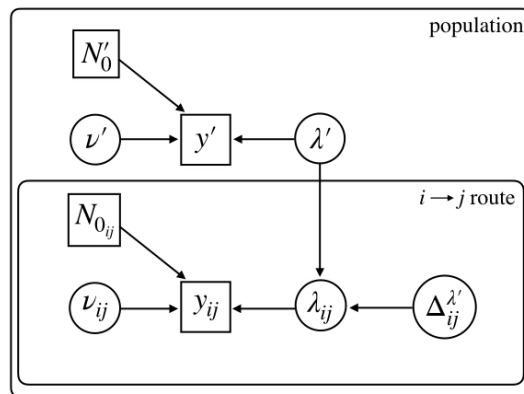

**Fig. S2.** Graph for the hierarchical trip duration decay model showing estimated parameters and scaling factors at the population- and route-level of the model. Parameters at the population-level are indicated by a prime symbol ( $\prime$ ) and the scaling factor is indicated with a capital delta ( $\Delta$ ). Estimated parameters are shown in circular nodes and data or parameters derived from data are shown in square nodes.

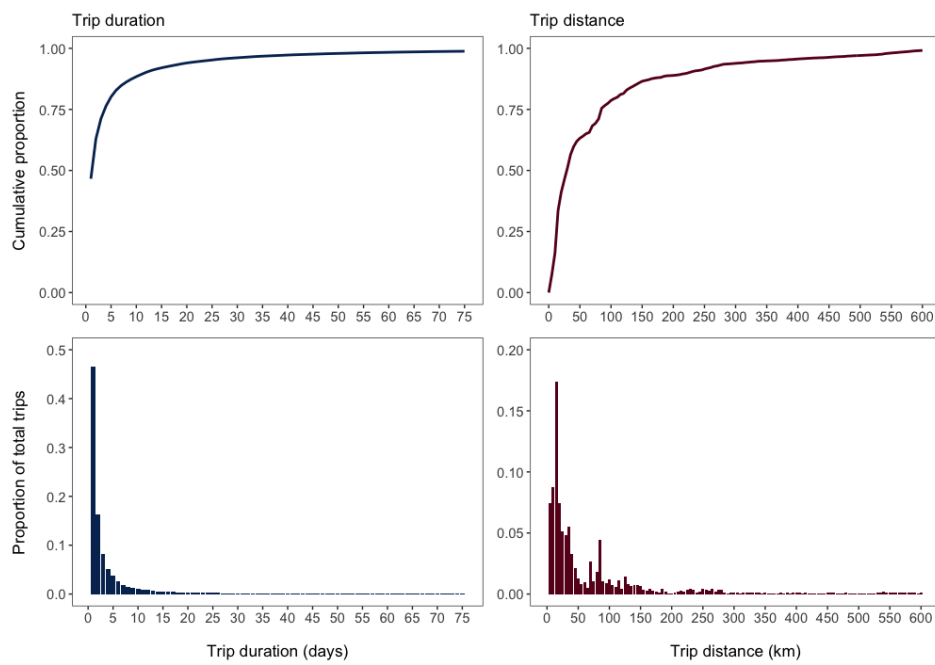

Fig. S3. The overall cumulative proportion and raw proportion of total trips for given values of trip duration and trip distance. See Table S1 for point measurements.



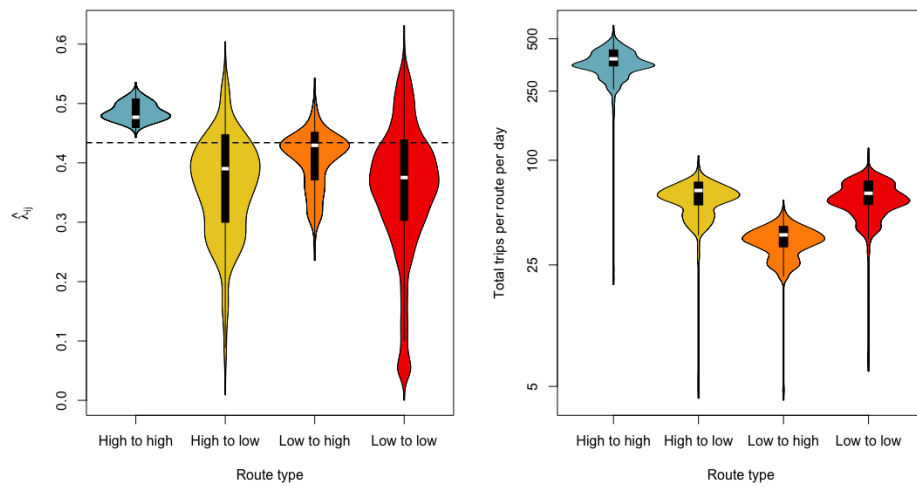

**Fig. S4.** Results from the Hierarchical Bayesian model that estimates the trip duration decay rate ( $\hat{\lambda}_{i,j}$ ). Values of  $\hat{\lambda}_{i,j}$  and proportion of total trips are plotted using a cutoff to define districts with 'high' or 'low' population density of 2500 people/km<sup>2</sup> (compared with 1000 people/km<sup>2</sup> in the main text). In panel A, the violin plots show the distribution of  $\hat{\lambda}_{i,j}$  for each of the four route-types compared to the population mean. In panel B, the violin plots show the distribution of the proportion of total trips for each of the four route-types over each day in the data set.

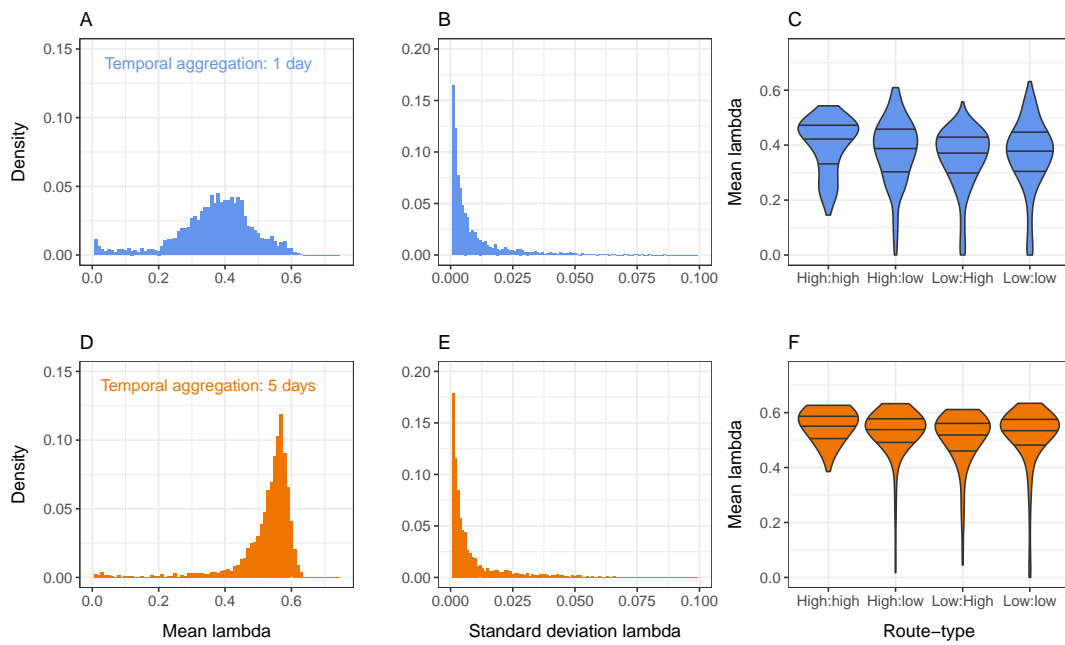

**Fig. S5.** Distribution of fitted trip duration decay rate parameters ( $\lambda_{ij}$ ) where trip duration counts are aggregated to 1-day (A–C) and 5-day (D–F) temporal intervals. The first column shows the normalized density of all the posterior means of  $\lambda_{ij}$  (A and D) and the second column shows the standard deviation (B and E). The third column shows the distribution of mean  $\lambda_{ij}$  values for each route-type, indicating whether the origin and destination are categorized as high or low population density (C and F).

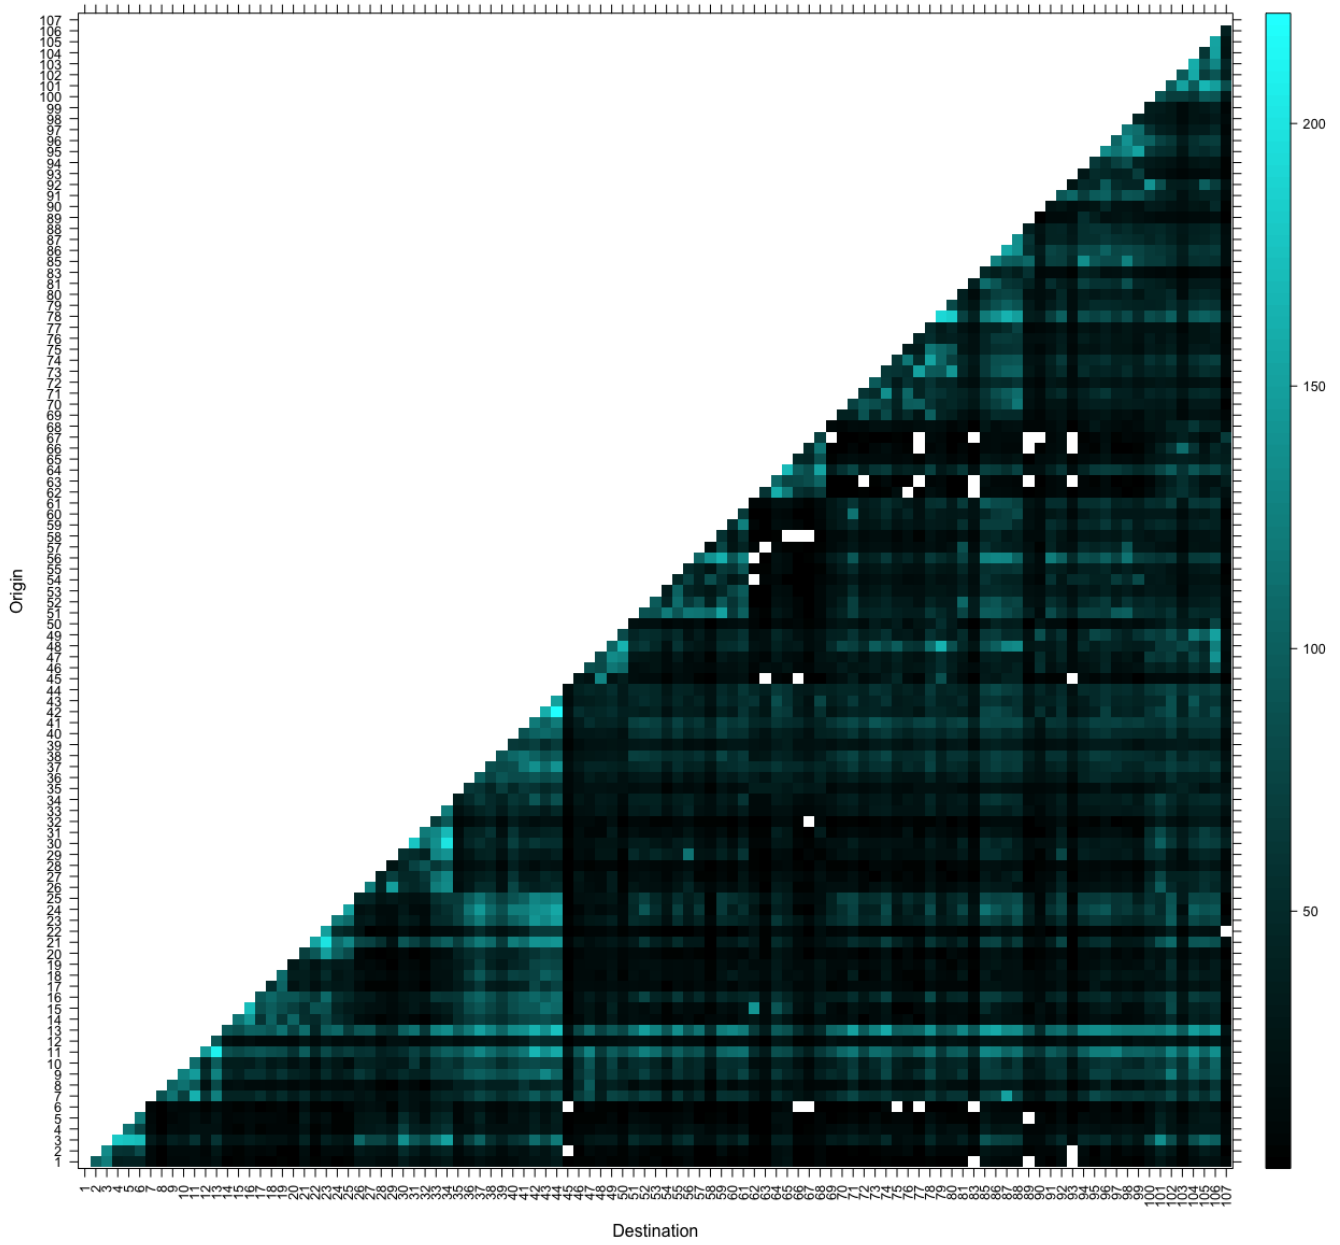

Fig. S6. Heatmap of sample sizes of observed trip duration counts for each  $ij$  route among all 107 districts.

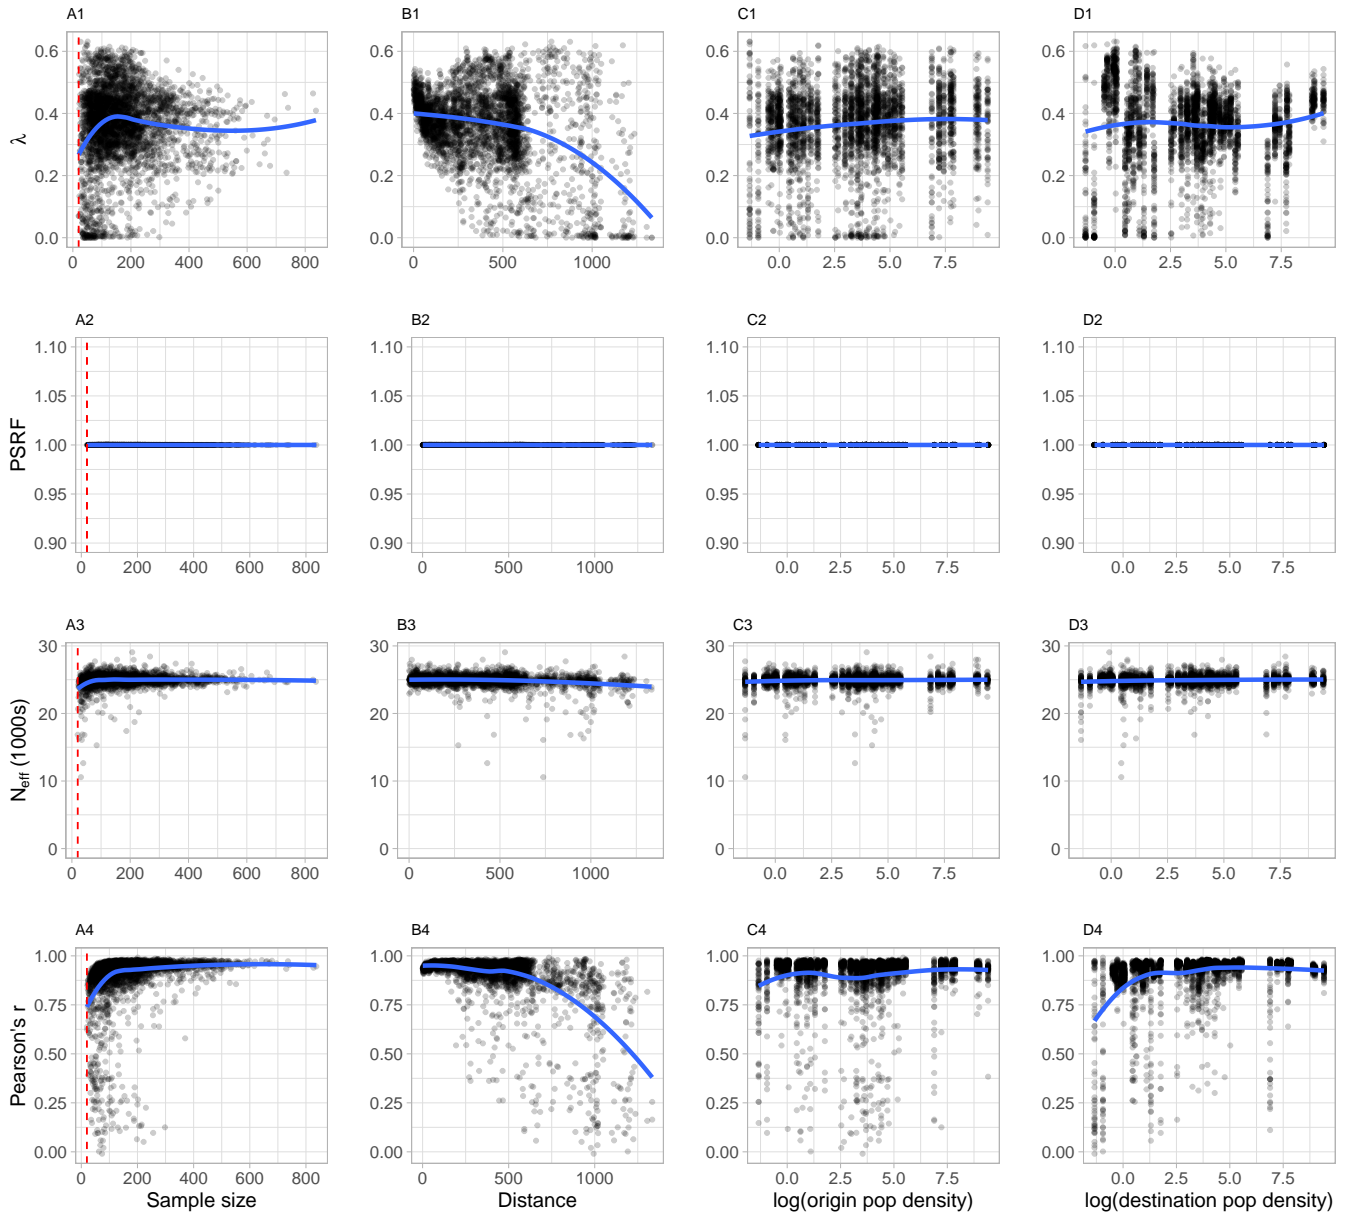

**Fig. S7.** Estimated trip duration decay parameter  $\lambda$  and model performance metrics plotted with: A) Sample size (number of unique observations of trip duration along each  $ij$  route), B) Distance between districts  $i$  and  $j$ , C) Population density ( $\text{km}^2$ ) of origin district, D) Population density ( $\text{km}^2$ ) of destination district. Decay parameter  $\lambda$  in row 1 show the mean of the posterior distribution of each route-level decay parameter ( $\lambda_{ij}$ ). Model performance metrics are shown along rows 2–4: 2) Potential Scale Reduction Factor (PSRF) is a measure of model convergence with values near 1 indicating model convergence, 3)  $N_{\text{eff}}$  is the effective sample size of the posterior distributions for each  $\lambda_{ij}$ , and 4) Pearson's  $r$  gives the correlation between the fitted model response and observed trip duration counts. The dashed red line in the A plots indicates the minimum sample size of  $n = 20$  unique observations of trip duration for all  $ij$  routes in the model.

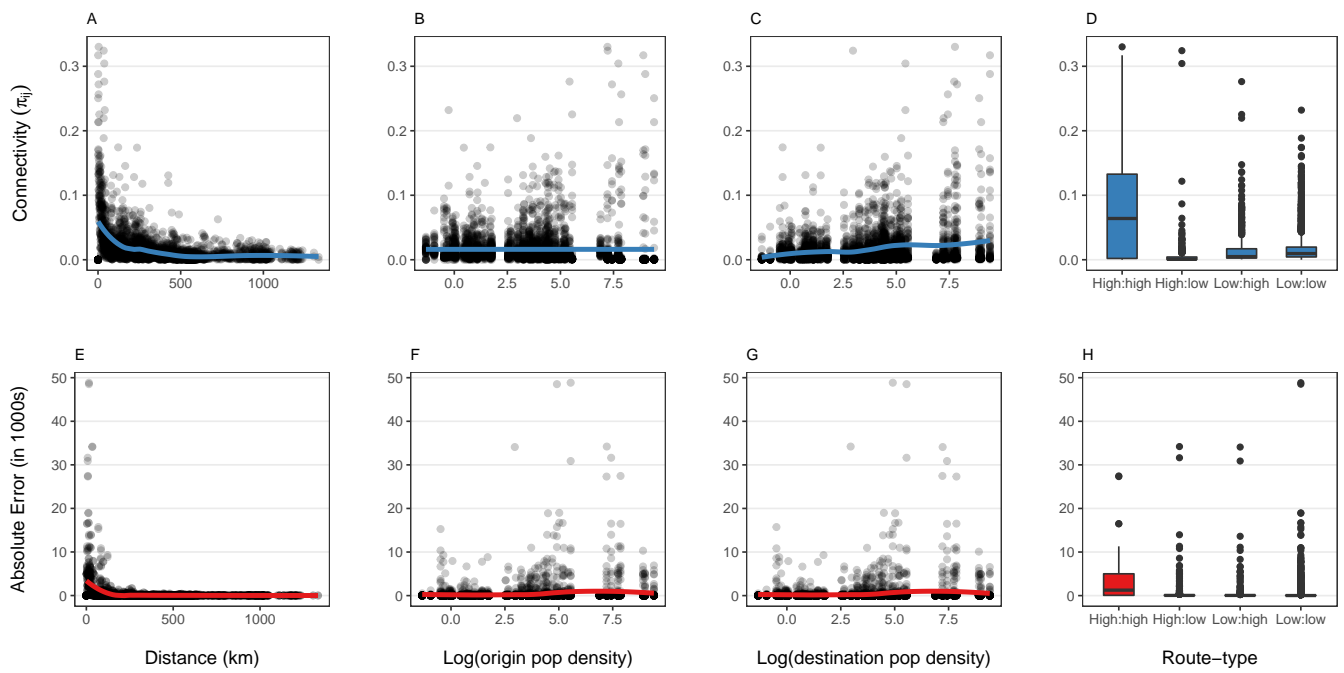

**Fig. S8.** Model performance of the trip duration decay model.

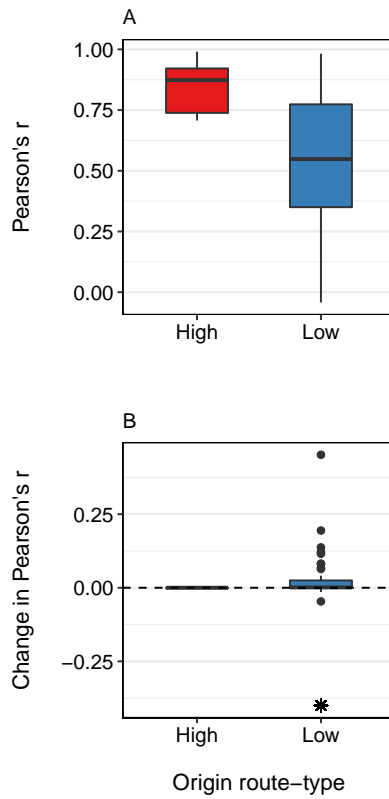

**Fig. S9.** Model performance of the trip duration decay model for routes that emanate from districts with either high or low population density. Panel A shows the distribution of Pearson's  $r$  of the basic gravity model for both route-types and panel B shows the change in these values from for the duration gravity model. In panel B, the asterisk indicates district 24 (Luderitz), which was an outlier with a drastic decrease in model fit.

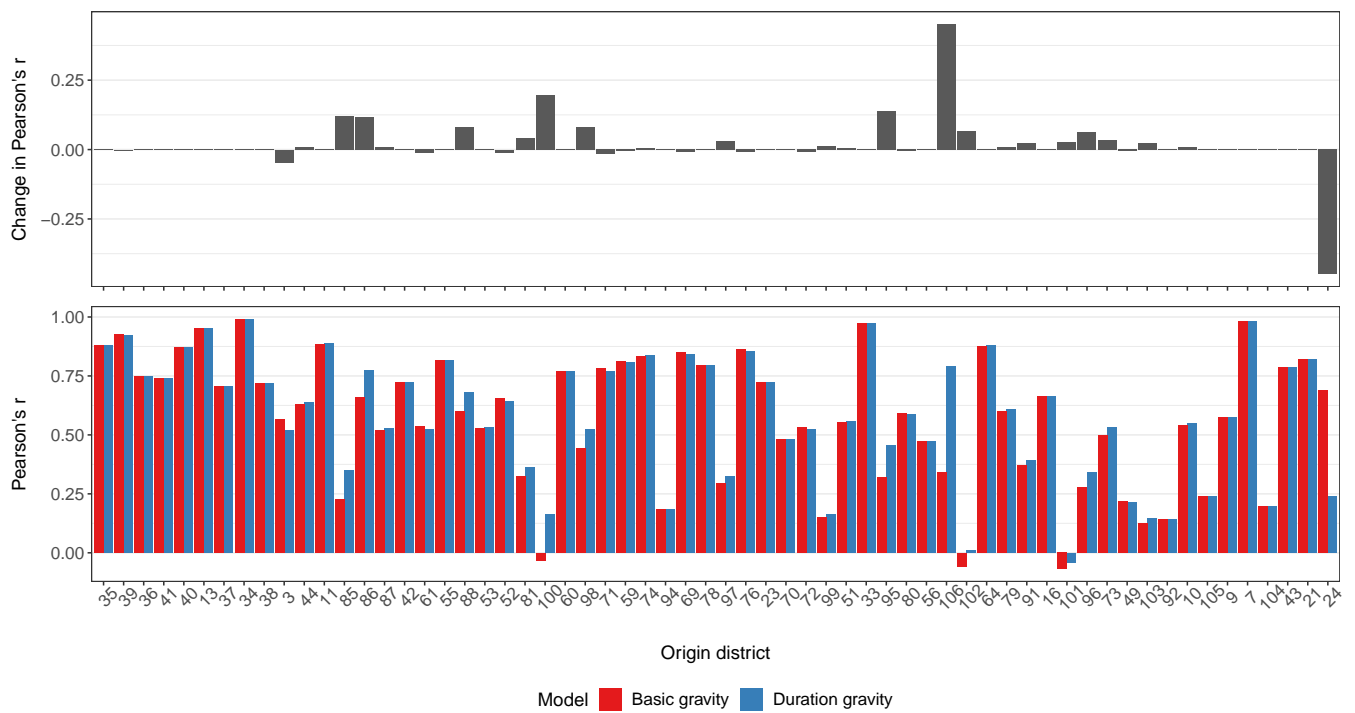

Fig. S10. Model performance of the trip duration decay model.

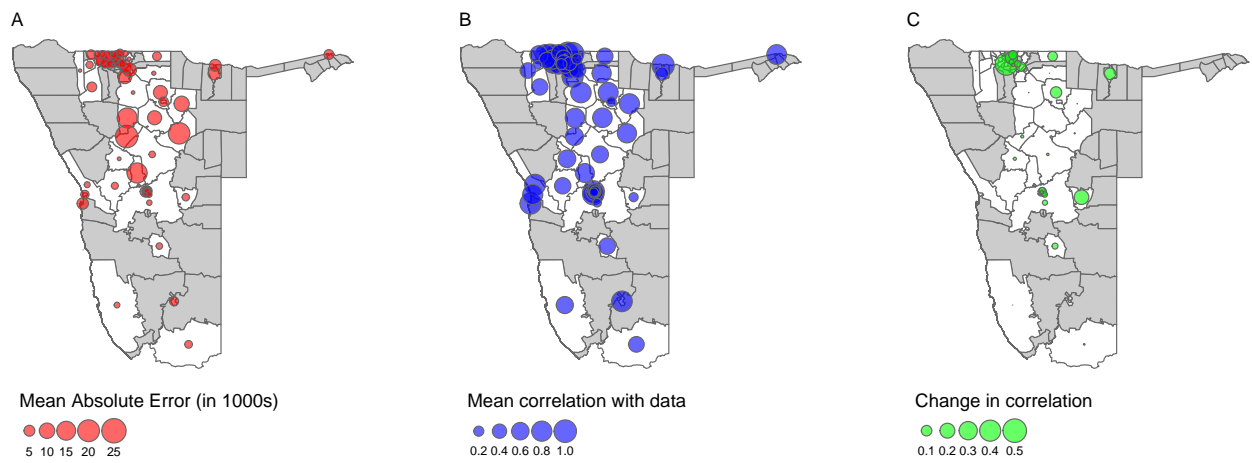

**Fig. S11.** Model performance of the trip duration decay model.



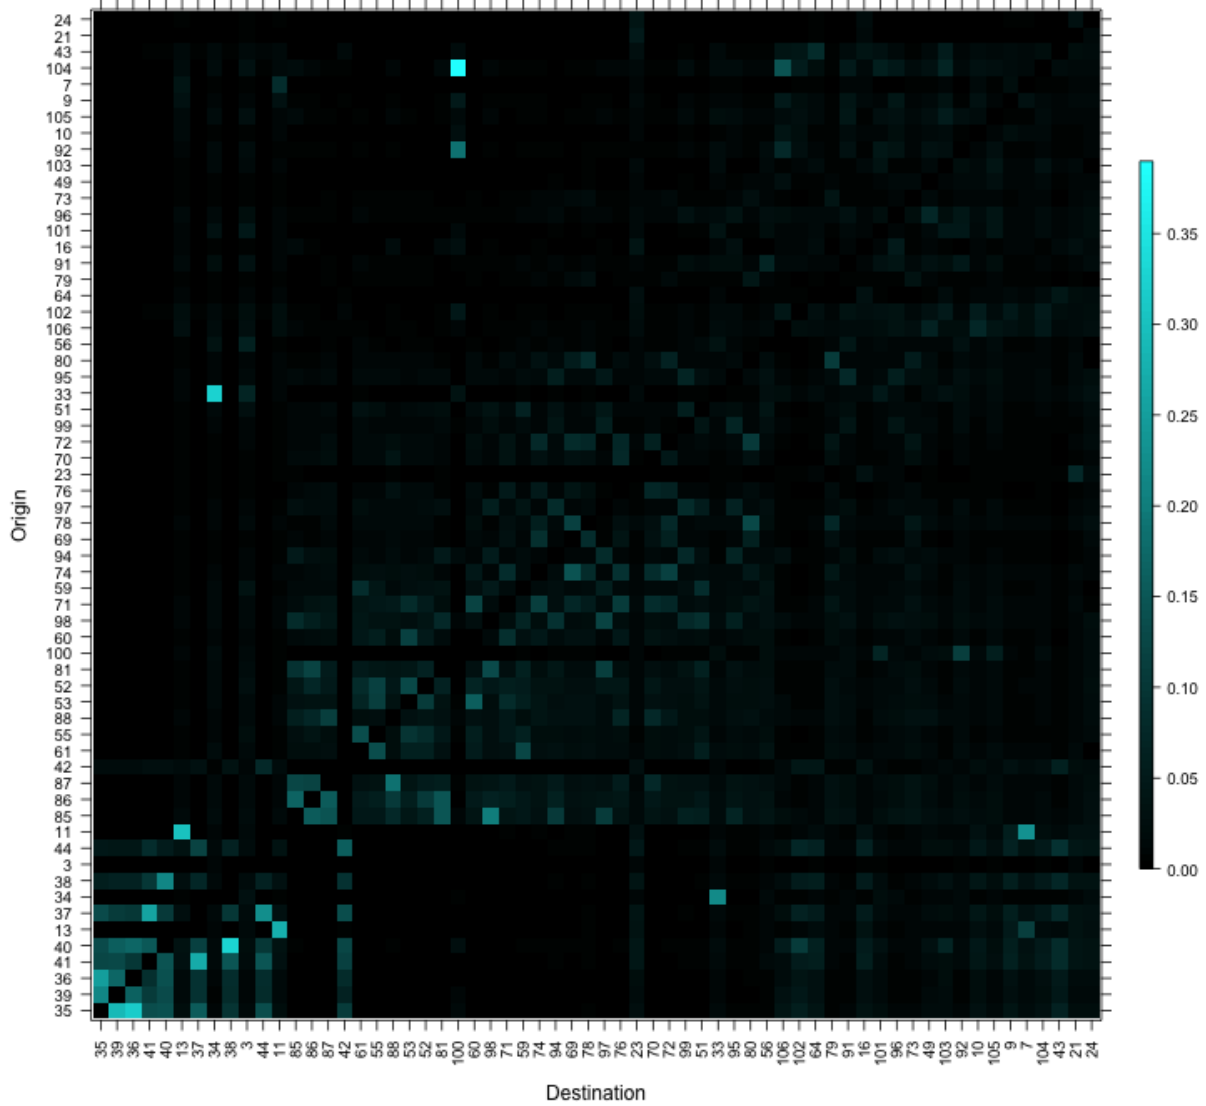

**Fig. S12.** Heatmap of pairwise values of estimated connectivity ( $\hat{\pi}_{ij}$ ) among all 62 districts in the analysis. Districts are sorted from high population density to low density, where connectivity among high-density districts are in the lower left and connectivity among low-density districts is shown in the top right.

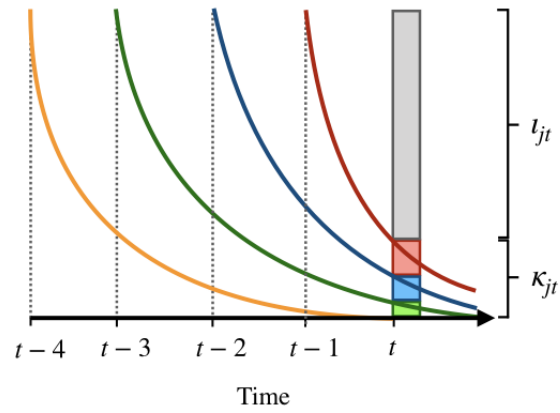

**Fig. S13.** A conceptual drawing of how the number of infected individuals from previous time steps ( $\kappa_{jt}$ ) contribute to the spatial force of infection at time  $t$  of a simulation.

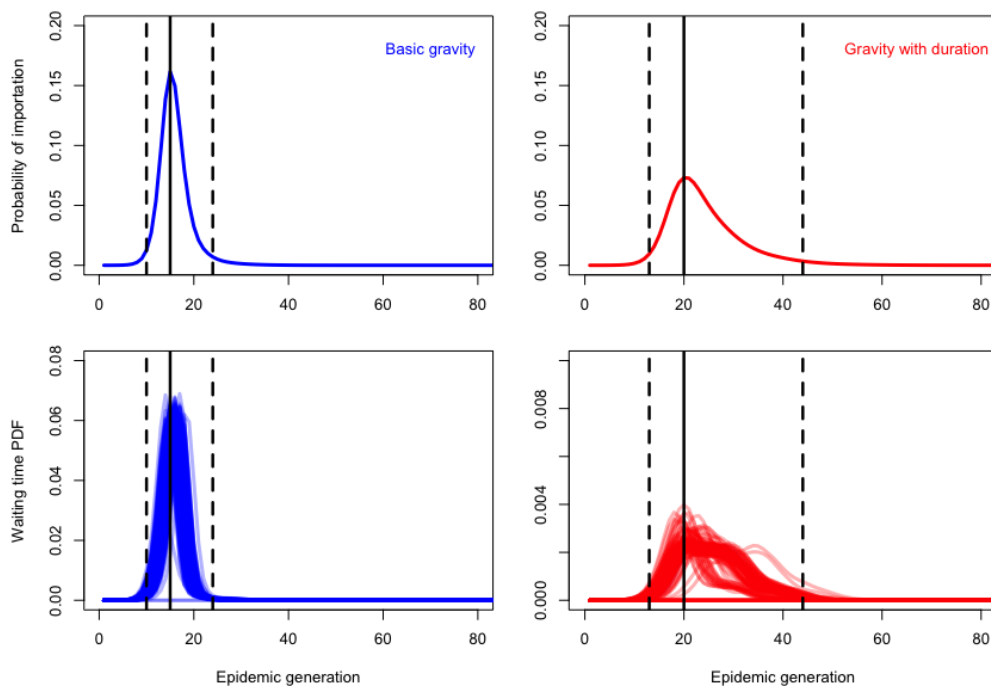

**Fig. S14.** An example of how simulations of the waiting time probability density function (PDF) are aggregated into the probability of pathogen importation. Spatial simulations using the basic gravity model are shown on the left (blue) and those with the gravity model with duration shown on the right (red). The solid lines indicate the peak and the dashed lines indicate the 95% highest posterior density (HPD) of the aggregate PDFs.

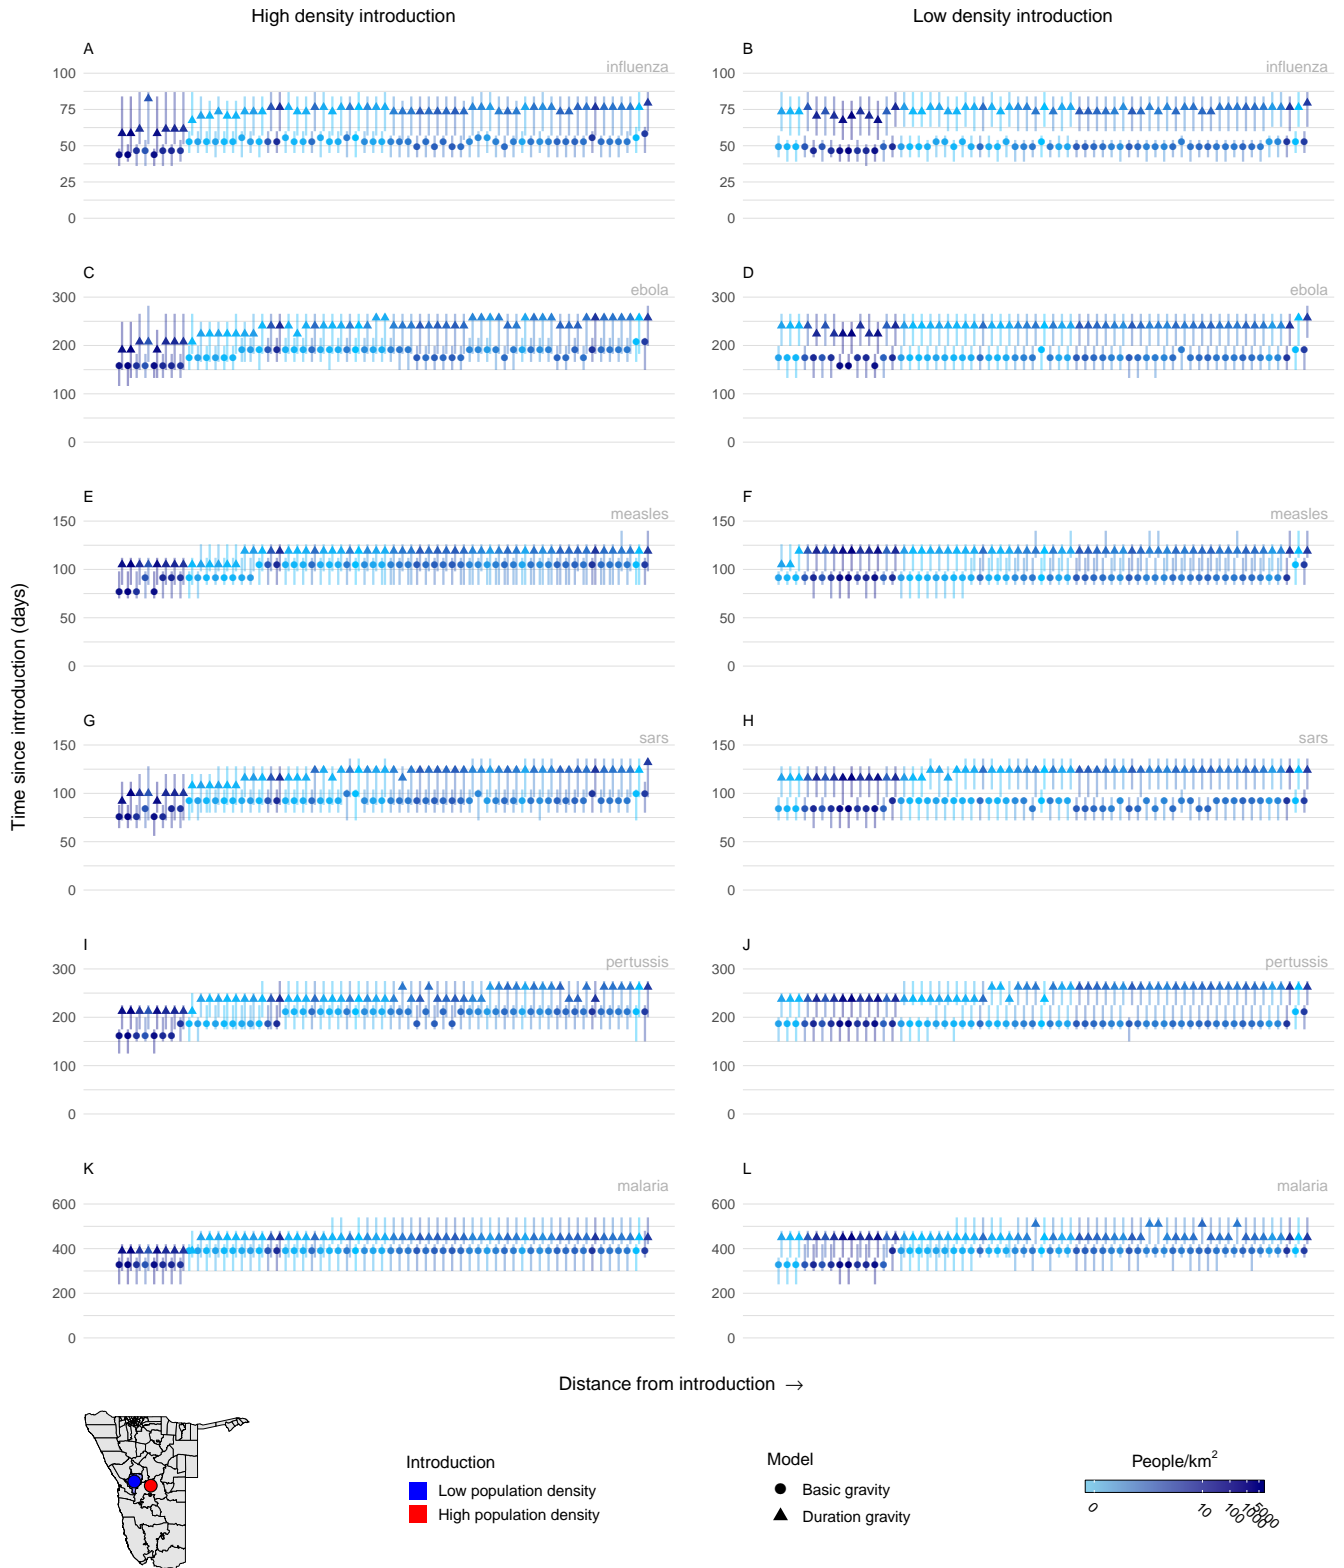

**Fig. S15.** Spatial TSIR simulations of infectious disease dispersal for 6 pathogens (influenza, measles, ebola, sars, pertussis, and malaria) introduced into districts with high population density (left) and low population density (right). Caterpillar plots represent the aggregated waiting time distributions of all simulations, where the peak waiting time is indicated with a circle for the basic gravity model or a triangle for the duration gravity model with vertical lines showing the 95% HPD intervals. The color of each caterpillar is given by the log population density of that district.

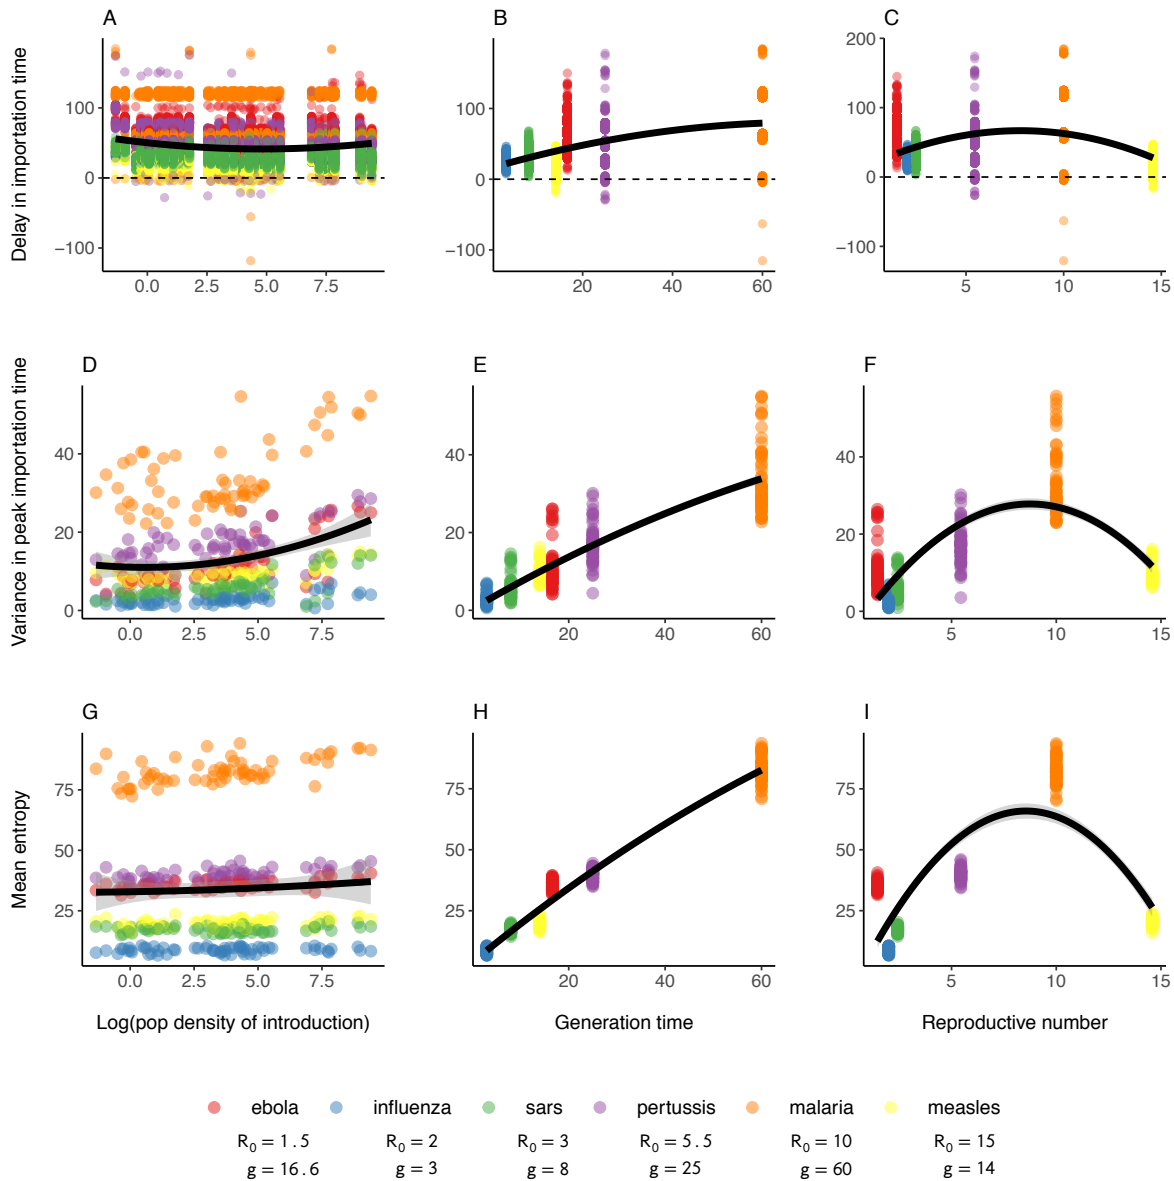

**Fig. S16.** Partial dependence plots showing overall patterns in spatial dispersal simulated by the duration TSIR model for 6 pathogens (influenza, measles, ebola, SARS, pertussis, and malaria). Results are plotted for three of the defining elements of simulations scenarios on the x-axes (population density of the introduction district, pathogen generation time  $g$ , and basic reproductive number  $R_0$ ) and three metrics of spatial transmission dynamics on the y-axes (delay in importation times caused by incorporating trip duration, variance in peak importation time, and uncertainty in importation time measured by mean entropy of waiting time distributions). Pathogens are indicated by color and the overall trend among the plotted variables is shown with a LOESS trendline (black lines).

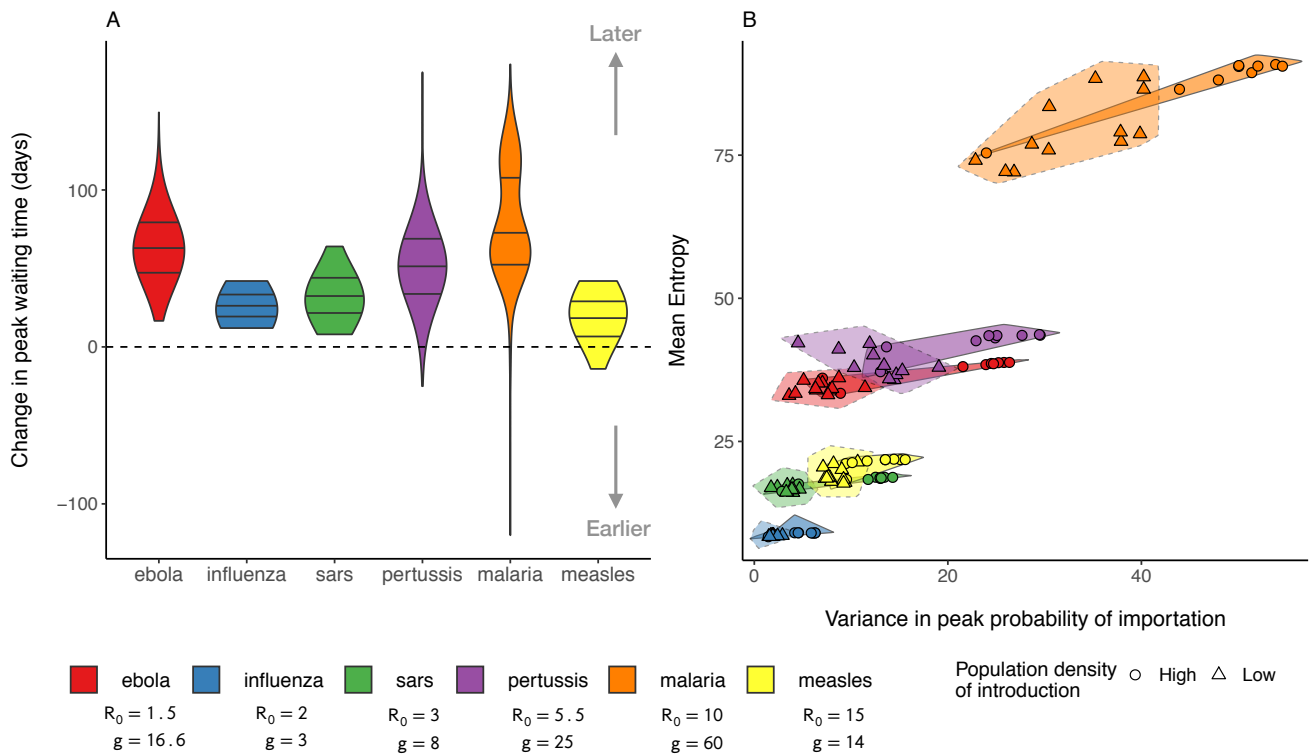

**Fig. S17.** Overall patterns in simulations of spatial transmission. Panel A shows the changes in peak waiting time distributions for 6 pathogens (influenza, measles, ebola, SARS, pertussis, and malaria) when the duration gravity model is used. Panel B shows the relationship between the variance and uncertainty in spatial spread given an introduction in the 10 highest (circles) and 10 lowest (triangles) density districts. Minimum convex polygons encircle each point type.

**Table S1. Cumulative proportion of total trips for given values of trip duration (days) and trip distance (km).**

| Variable        | Value | Proportion total trips |
|-----------------|-------|------------------------|
| Duration (days) | 1     | 0.47                   |
|                 | 3     | 0.71                   |
|                 | 7     | 0.85                   |
|                 | 14    | 0.92                   |
|                 | 30    | 0.96                   |
|                 | 60    | 0.98                   |
|                 | 90    | 0.99                   |
| Distance (km)   | 5     | 0.07                   |
|                 | 10    | 0.16                   |
|                 | 25    | 0.46                   |
|                 | 50    | 0.63                   |
|                 | 100   | 0.79                   |
|                 | 250   | 0.92                   |
|                 | 500   | 0.97                   |

**Table S2. Summary statistics for the distribution of estimated trip duration decay rate parameters ( $\hat{\lambda}_{ij}$ ) for each route-type at two population density thresholds (1000 and 2500 people/km<sup>2</sup>).**

| Threshold                   | Route-type   | Mean $\hat{\lambda}_{ij}$ | 95% HPD   |
|-----------------------------|--------------|---------------------------|-----------|
| 1000 people/km <sup>2</sup> | High to high | 0.45                      | 0.22–0.53 |
|                             | High to low  | 0.39                      | 0.12–0.58 |
|                             | Low to high  | 0.38                      | 0.2–0.48  |
|                             | Low to low   | 0.38                      | 0.01–0.57 |
| 2500 people/km <sup>2</sup> | High to high | 0.48                      | 0.45–0.53 |
|                             | High to low  | 0.39                      | 0.12–0.57 |
|                             | Low to high  | 0.43                      | 0.28–0.5  |
|                             | Low to low   | 0.38                      | 0.01–0.57 |



**Table S3. Transmission parameters used in spatial TSIR simulations.**

| $R_0$ | $g$  | $\beta$ | $\gamma$ | Pathogen  | Citation |
|-------|------|---------|----------|-----------|----------|
| 10    | 60   | 30      | 3        | malaria   | (9, 10)  |
| 15    | 14   | 17.5    | 1.2      | measles   |          |
| 5.5   | 25   | 9.8     | 1.8      | pertussis | (11, 12) |
| 3     | 8    | 3.4     | 1.4      | SARS      | (13)     |
| 2     | 3    | 1.5     | 0.75     | influenza |          |
| 1.5   | 16.6 | 3.8     | 2.6      | Ebola     | (14)     |

140 **References**

- 141 1. CJE Metcalf, et al., Implications of spatially heterogeneous vaccination coverage for the risk of congenital rubella syndrome  
142 in south africa. *J. Royal Soc. Interface* **10** (2013).
- 143 2. BT Grenfell, ON Bjørnstad, BF Finkenstädt, Dynamics of measles epidemics: Scaling noise, determinism, and predictability  
144 with the tsir model. *Ecol. Monogr.* **72**, 185–202 (2002).
- 145 3. ON Bjørnstad, BF Finkenstädt, BT Grenfell, Dynamics of measles epidemics: Estimating scaling of transmission rates  
146 using a time series SIR model. **72**, 17 (2002).
- 147 4. ON Bjørnstad, BT Grenfell, Hazards, spatial transmission and timing of outbreaks in epidemic metapopulations. *Environ.*  
148 *Ecol. Stat.* **15**, 265–277 (2008).
- 149 5. BF Finkenstädt, BT Grenfell, Time series modelling of childhood diseases: a dynamical systems approach. *J. Royal Stat.*  
150 *Soc. Ser. C Appl. Stat.* **49**, 187–205 (2000).
- 151 6. Y Xia, ON Bjørnstad, BT Grenfell, Measles metapopulation dynamics: A gravity model for epidemiological coupling and  
152 dynamics. *The Am. Nat.* **164**, 267–281 (2004).
- 153 7. K Glass, Y Xia, BT Grenfell, Interpreting time-series analyses for continuous-time biological models—measles as a case  
154 study. *J. Theor. Biol.* **223**, 19–25 (2003).
- 155 8. RT Clemen, RL Winkler, Combining probability distributions from experts in risk analysis. *Risk Analysis* **19** (1999).
- 156 9. JH Huber, GL Johnston, B Greenhouse, DL Smith, TA Perkins, Quantitative, model-based estimates of variability in the  
157 generation and serial intervals of plasmodium falciparum malaria. *Malar. J.* **15**, 490 (2016).
- 158 10. DL Smith, FE McKenzie, RW Snow, SI Hay, Revisiting the basic reproductive number for malaria and its implications for  
159 malaria control. *PLOS Biol.* **5**, e42 (2007).
- 160 11. MA Vink, MCJ Bootsma, J Wallinga, Serial intervals of respiratory infectious diseases: A systematic review and analysis.  
161 *Am. J. Epidemiol.* **180**, 865–875 (2014).
- 162 12. DE te Beest, et al., Estimation of the serial interval of pertussis in dutch households. *Epidemics* **7**, 1–6 (2014).
- 163 13. RM Anderson, et al., Epidemiology, transmission dynamics and control of SARS: the 2002–2003 epidemic. *Philos.*  
164 *Transactions Royal Soc. London. Ser. B: Biol. Sci.* **359**, 1091–1105 (2004).
- 165 14. G Chowell, H Nishiura, Transmission dynamics and control of ebola virus disease (EVD): a review. *BMC Medicine* **12**,  
166 196 (2014).
